# Supplementary material for: Pulmonary Targeting of Inhalable Moxifloxacin Microspheres for Effective Management of Tuberculosis
Source: MDPI journal article supplement (doi:10.3390/pharmaceutics13010079), 2021-01-08
Supplement: s1 [file s1]

# Supplementary Materials: Pulmonary Targeting of Inhalable Moxifloxacin Microspheres for Effective Management of Tuberculosis

Table S1. Model Parameters for the Studied Response Variables.

| Source                                              | Sum of Squares | Df | Mean Square | F-Value | <i>p</i> -Value |             |
|-----------------------------------------------------|----------------|----|-------------|---------|-----------------|-------------|
| <b>Drug loading (%) (<math>Y_1</math>)</b>          |                |    |             |         |                 |             |
| <b>Model</b>                                        | 361.17         | 5  | 72.23       | 29.52   | 0.0001          | Significant |
| $X_1$                                               | 354.22         | 1  | 354.22      | 144.74  | < 0.0001        |             |
| $X_2$                                               | 0.2259         | 1  | 0.2259      | 0.0923  | 0.7701          |             |
| $X_1X_2$                                            | 2.72           | 1  | 2.72        | 1.11    | 0.3266          |             |
| $X_1^2$                                             | 1.52           | 1  | 1.52        | 0.6219  | 0.4562          |             |
| $X_2^2$                                             | 2.96           | 1  | 2.96        | 1.21    | 0.3075          |             |
| <b>Entrapment Efficiency (%) (<math>Y_2</math>)</b> |                |    |             |         |                 |             |
| <b>Model</b>                                        | 1614.02        | 5  | 322.80      | 5.04    | 0.0282          | Significant |
| $X_1$                                               | 256.92         | 1  | 256.92      | 4.01    | 0.0853          |             |
| $X_2$                                               | 0.8304         | 1  | 0.8304      | 0.0130  | 0.9126          |             |
| $X_1X_2$                                            | 979.69         | 1  | 979.69      | 15.29   | 0.0058          |             |
| $X_1^2$                                             | 135.83         | 1  | 135.83      | 2.12    | 0.1888          |             |
| $X_2^2$                                             | 192.20         | 1  | 192.20      | 3.00    | 0.1269          |             |
| <b>Particle size (<math>Y_3</math>)</b>             |                |    |             |         |                 |             |
| <b>Model</b>                                        | 4.08           | 5  | 0.8157      | 6.37    | 0.0154          | Significant |
| $X_1$                                               | 1.88           | 1  | 1.88        | 14.69   | 0.0064          |             |
| $X_2$                                               | 0.5076         | 1  | 0.5076      | 3.96    | 0.0868          |             |
| $X_1X_2$                                            | 0.0025         | 1  | 0.0025      | 0.0195  | 0.8928          |             |
| $X_1^2$                                             | 0.4007         | 1  | 0.4007      | 3.13    | 0.1203          |             |
| $X_2^2$                                             | 1.09           | 1  | 1.09        | 8.47    | 0.0226          |             |

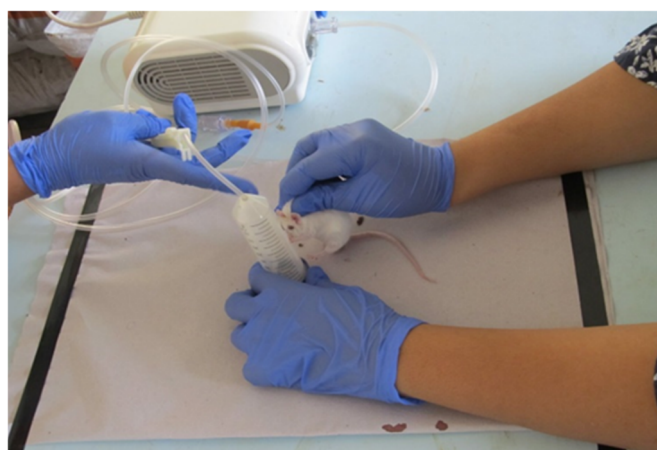

Figure S1. “Nose-only” Inhalation Apparatus Used for Administering Inhalable Microparticles to Mice.

The delivery chamber consisted of a 50-mL plastic centrifuge tube with a hole of ~0.5 cm diameter at a distance of about 2.5 cm from the rim. The powder for inhalation was weighed in the cap. A length of tubing (i.d. ~ 2mm) was inserted into the tube from the apex of the taper (through another orifice) to a clearance of about 2.5–5 mm from the inner

surface of the cap. The tubing was connected to the air pump to admit a turbulent air stream, at a constant rate, for fluidizing the powder for 60 s.

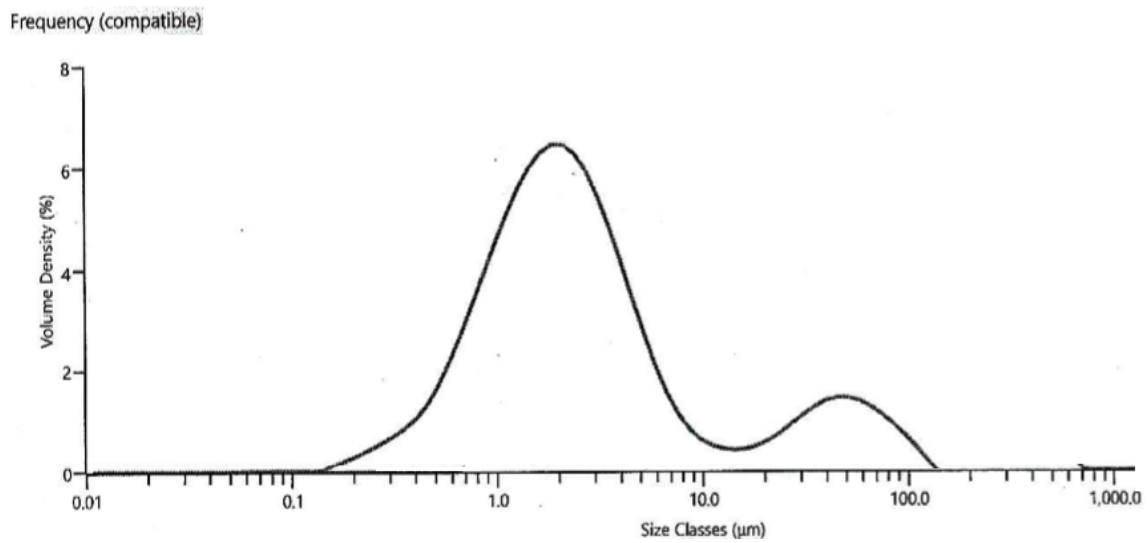

Figure S2. Particle size distribution of Optimized MXF-PLGA-MS.

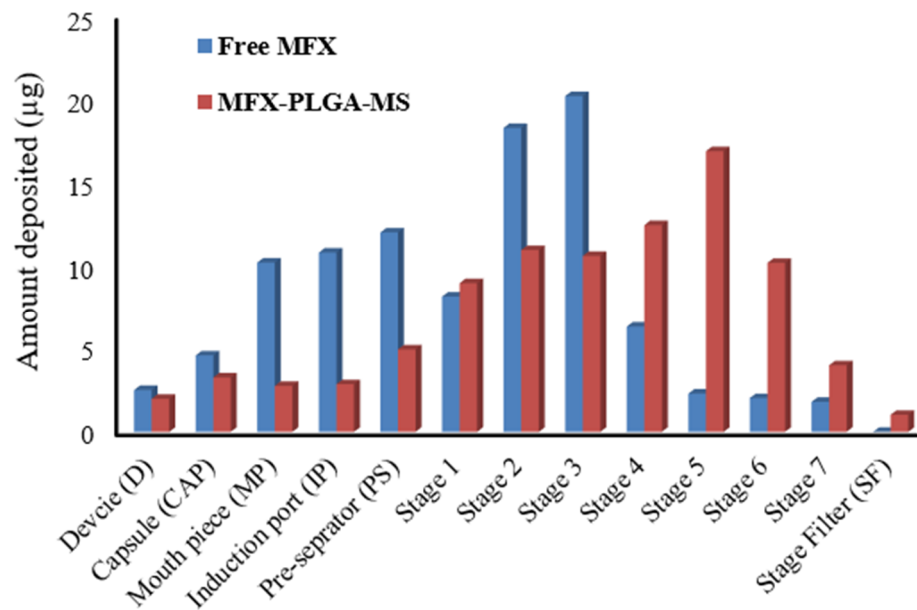

Figure S3. Moxifloxacin amount deposited into different stages of Anderson Cascade.

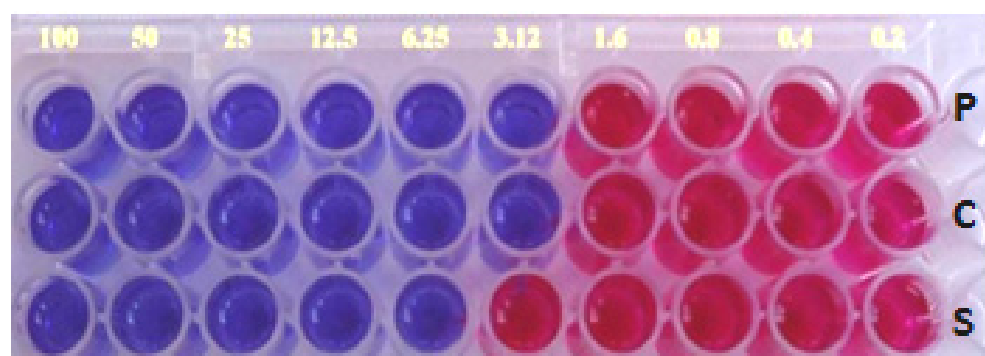

Figure S4. Anti-tubercular activity of standard drugs; (P) Pyrazinamide, (C) Ciprofloxacin, (S) Streptomycin.

**Table S2.** Stability Studies of Optimized MXF-PLGA-MS.

| Stability Condition<br>(Temp./RH) | Time Point            | Drug Loading<br>(%) | Entrapment Efficiency<br>(%) |
|-----------------------------------|-----------------------|---------------------|------------------------------|
| 5 ± 2 °C/ambient RH               | Initial               | 21.98 ± 0.23        | 78.00 ± 1.22                 |
|                                   | 2 weeks               | 21.75 ± 0.98        | 77.68 ± 1.10                 |
|                                   | 1 month               | 22.09 ± 1.25        | 78.12 ± 1.45                 |
|                                   | 2 months              | 21.98 ± 2.06        | 77.89 ± 1.73                 |
|                                   | 3 months              | 21.65 ± 1.89        | 77.93 ± 1.59                 |
|                                   | 6 months              | 21.87 ± 1.11        | 77.55 ± 1.92                 |
|                                   | 25 ± 2 °C/60 ± 5 % RH | Initial             | 21.98 ± 0.95                 |
| 2 weeks                           |                       | 21.56 ± 1.65        | 77.98 ± 1.02                 |
| 1 month                           |                       | 21.43 ± 1.89        | 78.04 ± 1.10                 |
| 2 months                          |                       | 21.69 ± 1.76        | 78.14 ± 1.07                 |
| 3 months                          |                       | 21.54 ± 1.32        | 77.87 ± 1.17                 |
| 6 months                          |                       | 21.89 ± 1.25        | 77.92 ± 1.10                 |
| 40 ± 2 °C/75 ± 5 % RH             |                       | Initial             | 21.98 ± 1.36                 |
|                                   | 2 weeks               | 20.98 ± 1.89        | 78.06 ± 1.11                 |
|                                   | 1 month               | 20.16 ± 2.05        | 77.13 ± 1.33                 |
|                                   | 2 months              | 20.07 ± 1.93        | 77.65 ± 1.75                 |
|                                   | 3 months              | 19.87 ± 1.22        | 76.98 ± 1.32                 |
|                                   | 6 months              | 18.16 1.65          | 73.87 ± 1.65                 |
